# Supplementary material
Source: ML conference proceedings conference paper supplement (https://openreview.net/forum?id=rGffMdIi9g9)

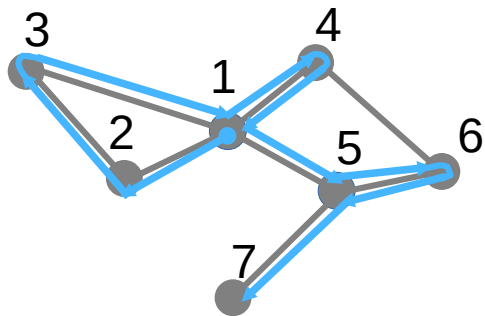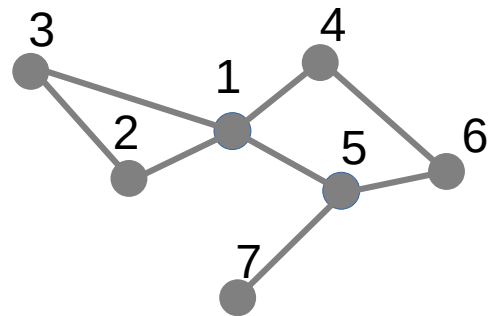

Walk order 1, 2, 3, 1, 4, 1, 5, 6, 5, 7

|   |       |   |   |   |   |   |   |   |
|---|-------|---|---|---|---|---|---|---|
| 3 | Index | 1 | 2 | 3 | 4 | 5 | 6 | 7 |
|   | Count | 3 | 1 | 0 | 1 | 2 | 1 | 1 |

Center index Context

|   |       |   |   |   |   |   |   |   |
|---|-------|---|---|---|---|---|---|---|
| 2 | Index | 1 | 2 | 3 | 4 | 5 | 6 | 7 |
|   | Count | 3 | 1 | 0 | 1 | 2 | 1 | 1 |

|   |       |   |   |   |   |   |   |   |
|---|-------|---|---|---|---|---|---|---|
| 5 | Index | 1 | 2 | 3 | 4 | 5 | 6 | 7 |
|   | Count | 3 | 1 | 0 | 1 | 2 | 1 | 1 |

|   |       |   |   |   |   |   |   |   |
|---|-------|---|---|---|---|---|---|---|
| 1 | Index | 1 | 2 | 3 | 4 | 5 | 6 | 7 |
|   | Count | 2 | 1 | 1 | 1 | 2 | 1 | 1 |

Center index Context

|   |       |   |   |   |   |   |   |   |
|---|-------|---|---|---|---|---|---|---|
| 4 | Index | 1 | 2 | 3 | 4 | 5 | 6 | 7 |
|   | Count | 2 | 1 | 1 | 1 | 2 | 1 | 1 |

|   |       |   |   |   |   |   |   |   |
|---|-------|---|---|---|---|---|---|---|
| 2 | Index | 1 | 2 | 3 | 4 | 5 | 6 | 7 |
|   | Count | 2 | 1 | 1 | 1 | 2 | 1 | 1 |

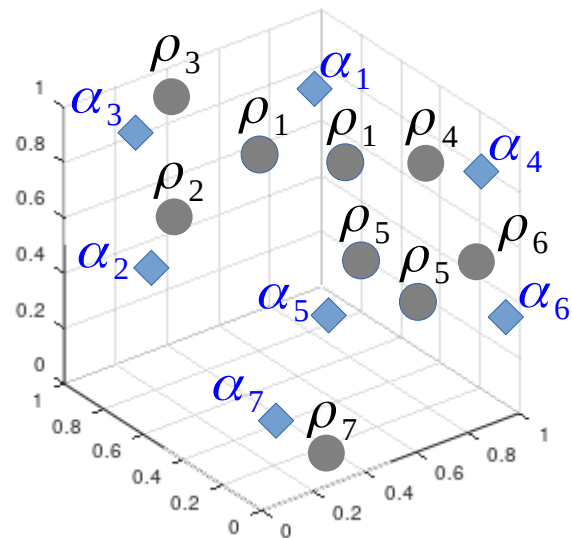

Supplement: supplementary_material [file attachment]
